# Supplementary material for: Phytochemical Cue for the Fitness Costs of Herbicide-Resistant Weeds
Source: MDPI journal article supplement (doi:10.3390/plants12173158), 2023-09-02
Supplement: s1 [file s1]

Supplementary materials

## Phytochemical cue for the fitness costs of herbicide-resistant weeds

Hong-Yu Li<sup>1</sup>, Yan Guo<sup>1</sup>, Bo-Yan Jin<sup>1</sup>, Xue-Fang Yang<sup>2,\*</sup> and Chui-Hua Kong<sup>1,\*</sup>

This supplementary material was prepared to add the readers more details, for which there was not enough space in the main manuscript, about:

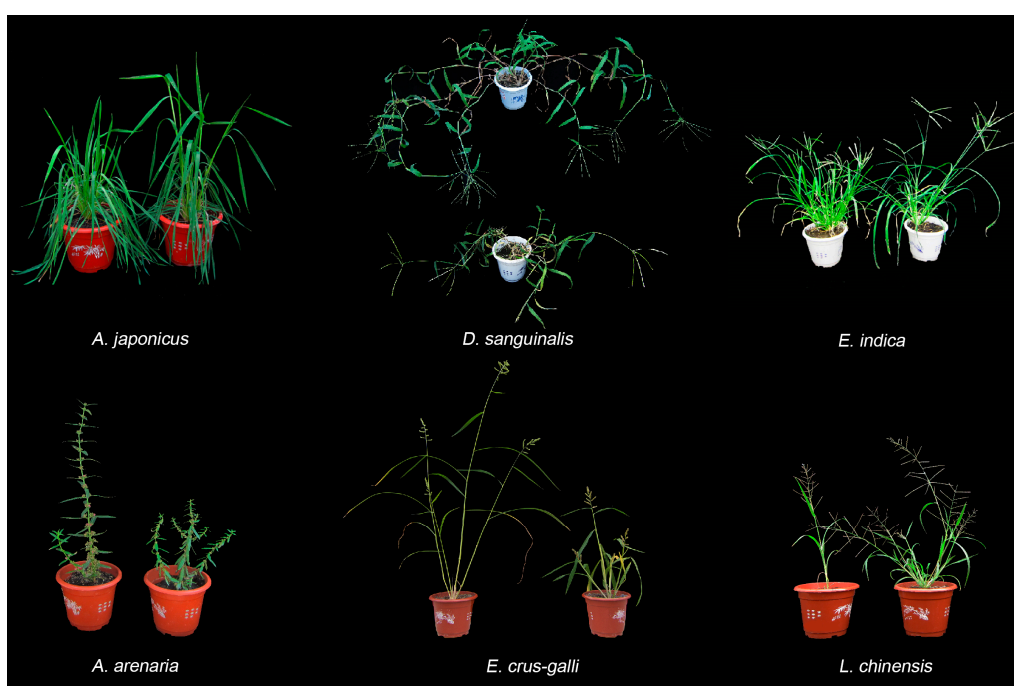

**Figure S1.** Aboveground morphology of herbicide-resistant and -susceptible weeds at the flowering stage. The left or above are herbicide-resistant biotypes and the right or below are the susceptible counterparts within a weed species.

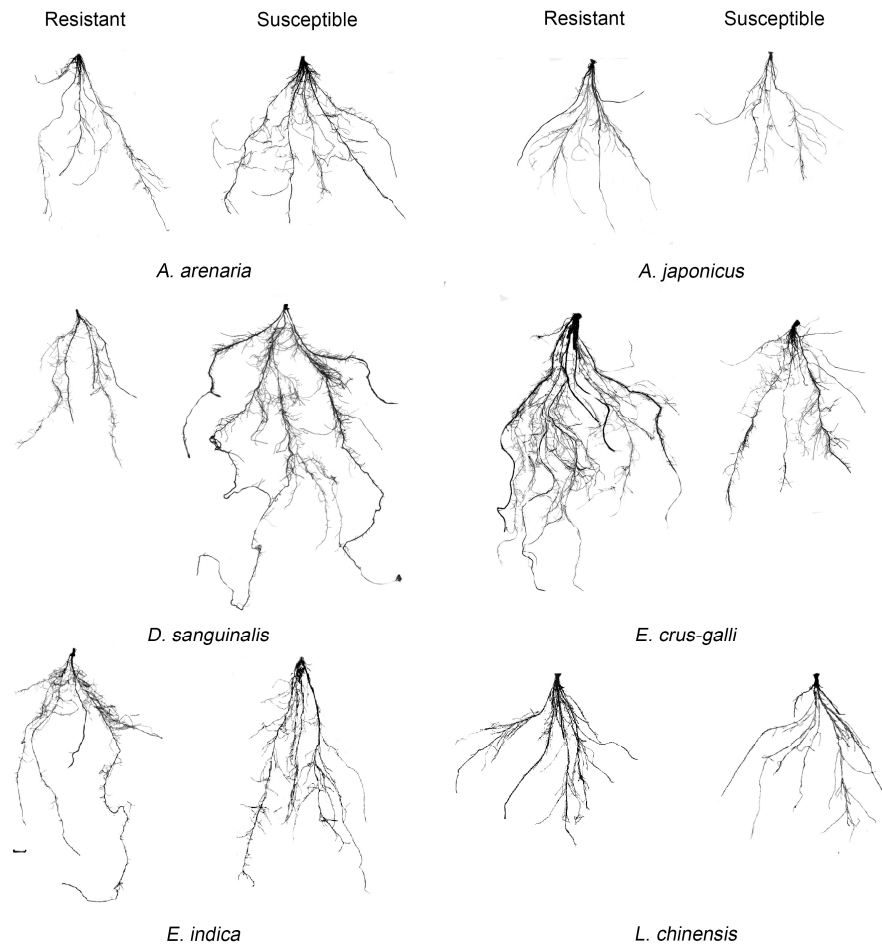

**Figure S2.** Root morphology of herbicide-resistant and -susceptible weeds. The left is herbicide-resistant biotypes and the right is the susceptible counterparts within a weed species.

**Table S1.** Plant height and biomass of herbicide-resistant and -susceptible weeds at the seedling and tillering stages

| Stage     | Weeds                         | Herbicide          | Biotypes    | Height (cm)   | Shoot biomass (mg) | Root biomass (mg) | Root/Shoot (biomass) |
|-----------|-------------------------------|--------------------|-------------|---------------|--------------------|-------------------|----------------------|
| Seedling  | <i>Alopecurus japonicus</i>   | fenoxaprop-p-ethyl | resistant   | 11.300±0.100b | 6.100±0.802a       | 4.933±0.669a      | 0.808±0.016a         |
|           |                               |                    | susceptible | 14.867±0.067a | 6.233±0.348a       | 3.367±0.260a      | 0.540±0.032b         |
|           | <i>Digitaria sanguinalis</i>  | glyphosate         | resistant   | 18.933±2.331a | 249.000±50.090b    | 33.333±7.965b     | 0.132±0.005a         |
|           |                               |                    | susceptible | 27.433±1.071a | 1136.667±166.859a  | 84.000±14.731a    | 0.078±0.022b         |
|           | <i>Eleusine indica</i>        | glyphosate         | resistant   | 3.567±0.167a  | 37.433±2.501a      | 28.833±1.695a     | 0.772±0.019a         |
|           |                               |                    | susceptible | 2.733±0.260b  | 23.067±2.21b       | 18.367±4.108b     | 0.776±0.109a         |
|           | <i>Ammannia arenaria</i>      | bensulfuron-methyl | resistant   | 8.767±0.869a  | 39.467±2.919b      | 3.300±0.404b      | 0.084±0.012a         |
|           |                               |                    | susceptible | 10.233±0.353a | 66.867±8.650a      | 7.667±1.132a      | 0.115±0.011a         |
|           | <i>Echinochloa crus-galli</i> | metamifop          | resistant   | 37.200±0.379a | 91.667±3.671a      | 24.467±1.601a     | 0.267±0.013a         |
|           |                               |                    | susceptible | 29.733±1.235b | 55.600±6.295b      | 16.100±1.779b     | 0.295±0.036a         |
|           | <i>Leptochloa chinensis</i>   | cyhalofop-butyl    | resistant   | 7.067±0.233a  | 6.767±0.639a       | 2.100±0.265a      | 0.309±0.013a         |
|           |                               |                    | susceptible | 6.533±0.406a  | 8.900±0.651a       | 2.400±0.513a      | 0.267±0.048b         |
| Tillering | <i>Alopecurus japonicus</i>   | fenoxaprop-p-ethyl | resistant   | 20.567±0.617a | 82.4±15.435b       | 17.6±3.361b       | 0.214±0.009a         |
|           |                               |                    | susceptible | 22.667±0.333a | 178.9±28.016b      | 40.9±7.845a       | 0.226±0.007a         |
|           | <i>Digitaria sanguinalis</i>  | glyphosate         | resistant   | 56.633±2.17a  | 826.6±48.579b      | 157.733±7.792b    | 0.191±0.006a         |
|           |                               |                    | susceptible | 66.933±3.325a | 2646.233±117.986a  | 351.4±39.676a     | 0.134±0.019b         |
|           | <i>Eleusine indica</i>        | glyphosate         | resistant   | 18±1.756a     | 280.633±29.74a     | 58.233±6.629b     | 0.216±0.04b          |
|           |                               |                    | susceptible | 18.333±1.424a | 277.333±23.398a    | 90.633±7.835a     | 0.332±0.045a         |
|           | <i>Ammannia arenaria</i>      | bensulfuron-methyl | resistant   | 14.57±0.591b  | 274.333±10.145b    | 28.833±2.154b     | 0.106±0.012a         |
|           |                               |                    | susceptible | 16.067±0.437a | 420.3±11.778a      | 50.233±2.82a      | 0.12±0.007a          |
|           | <i>Echinochloa crus-galli</i> | metamifop          | resistant   | 88.967±0.939a | 5356.667±886.648a  | 613.333±60.645a   | 0.118±0.011b         |
|           |                               |                    | susceptible | 61.5±2.066b   | 696.667±107.134b   | 183.333±17.638b   | 0.274±0.046a         |
|           | <i>Leptochloa chinensis</i>   | cyhalofop-butyl    | resistant   | 21.567±1.027a | 79.633±3.656a      | 17.867±0.338a     | 0.225±0.007a         |
|           |                               |                    | susceptible | 20.267±0.717a | 69.067±4.119b      | 15.833±0.857a     | 0.232±0.025b         |

Values are means ± SE. Data with different letters indicate a significant different at  $P < 0.05$ , according to one-way ANOVA, followed by Tukey HSD test

**Table S2.** Eigenvalues and variance contributions of different resistant and sensitive biotypes of weed factors

| Component | Initial Eigenvalue |                  |             | Extract the sum of squared loads |                  |             |
|-----------|--------------------|------------------|-------------|----------------------------------|------------------|-------------|
|           | Total              | Percent Variance | Accumulate% | Total                            | Percent Variance | Accumulate% |
| 1         | 6.427              | 29.213           | 29.213      | 6.427                            | 29.213           | 29.213      |
| 2         | 5.274              | 23.972           | 53.184      | 5.274                            | 23.972           | 53.184      |
| 3         | 3.919              | 17.813           | 70.997      | 3.919                            | 17.813           | 70.997      |
| 4         | 2.069              | 9.407            | 80.404      | 2.069                            | 9.407            | 80.404      |

**Table S3.** Component load matrix (PC1-4) and principal component coefficient (Y1-4) of each characteristic index of weeds with different resistant and susceptible

biotypes

| Index                | PC1    | F1     | PC2    | F2     | PC3    | F3     | PC4    | F4     |
|----------------------|--------|--------|--------|--------|--------|--------|--------|--------|
| Height               | 0.438  | 0.173  | 0.681  | 0.297  | -0.262 | -0.133 | 0.336  | 0.233  |
| AG biomass           | 0.679  | 0.268  | 0.413  | 0.180  | -0.265 | -0.134 | 0.454  | 0.315  |
| BG biomass           | 0.602  | 0.238  | 0.086  | 0.037  | 0.171  | 0.086  | 0.698  | 0.485  |
| Root length          | 0.695  | 0.274  | 0.590  | 0.257  | -0.195 | -0.098 | -0.100 | -0.069 |
| Root surface area    | 0.731  | 0.288  | 0.372  | 0.162  | -0.265 | -0.134 | 0.018  | 0.012  |
| Root volume          | 0.802  | 0.316  | 0.486  | 0.212  | -0.038 | -0.019 | 0.034  | 0.024  |
| Photosynthetic rate  | 0.497  | 0.196  | -0.704 | -0.306 | 0.271  | 0.137  | 0.389  | 0.270  |
| Stomatal conductance | 0.658  | 0.260  | -0.597 | -0.260 | 0.301  | 0.152  | 0.057  | 0.040  |
| Transpiration rate   | 0.653  | 0.258  | -0.613 | -0.267 | 0.335  | 0.169  | 0.011  | 0.008  |
| Chlorophyll          | -0.241 | -0.095 | 0.573  | 0.250  | -0.417 | -0.211 | -0.369 | -0.257 |
| Shoot CAT            | -0.562 | -0.222 | 0.297  | 0.129  | 0.615  | 0.311  | 0.279  | 0.194  |
| Root CAT             | 0.496  | 0.196  | -0.364 | -0.159 | 0.699  | 0.353  | -0.268 | -0.186 |
| Shoot SOD            | -0.064 | -0.025 | 0.443  | 0.193  | 0.714  | 0.361  | -0.029 | -0.020 |
| Root SOD             | 0.245  | 0.097  | 0.505  | 0.220  | 0.480  | 0.242  | -0.564 | -0.392 |
| Shoot MDA            | -0.384 | -0.152 | 0.501  | 0.218  | 0.604  | 0.305  | 0.328  | 0.228  |
| Root MDA             | -0.317 | -0.125 | 0.468  | 0.204  | 0.685  | 0.346  | 0.344  | 0.239  |
| Shoot phenols        | -0.332 | -0.131 | 0.599  | 0.261  | -0.296 | -0.150 | 0.274  | 0.190  |
| Root phenols         | -0.345 | -0.136 | 0.379  | 0.165  | 0.090  | 0.045  | -0.003 | -0.002 |
| Shoot (-)-loliolide  | -0.609 | -0.240 | -0.306 | -0.133 | -0.410 | -0.207 | 0.199  | 0.138  |
| Root (-)-loliolide   | -0.841 | -0.332 | 0.163  | 0.071  | 0.057  | 0.029  | 0.171  | 0.119  |
| Days to flowering    | -0.158 | -0.062 | -0.468 | -0.204 | -0.677 | -0.342 | 0.305  | 0.212  |
| Seed production      | 0.620  | 0.244  | 0.610  | 0.266  | -0.160 | -0.081 | -0.177 | -0.123 |

**Table S4.** Principal component scores of herbicide-resistant and -susceptible weeds

| Weeds                         | Biotypes    | Y1     | Y2     | Y3     | Y4     | Y      |
|-------------------------------|-------------|--------|--------|--------|--------|--------|
| <i>Ammannia arenaria</i>      | Resistant   | -0.878 | -1.495 | -0.421 | -1.837 | -0.863 |
|                               | Susceptible | -1.817 | -0.602 | -1.149 | -2.203 | -1.087 |
| <i>Alopecurus japonicus</i>   | Resistant   | 1.462  | -2.623 | -0.358 | -0.475 | -0.310 |
|                               | Susceptible | -0.910 | -2.899 | -2.820 | 0.704  | -1.397 |
| <i>Digitaria sanguinalis</i>  | Resistant   | -1.643 | -0.383 | -1.650 | 0.988  | -0.773 |
|                               | Susceptible | 1.992  | 1.745  | -2.858 | 2.544  | 0.730  |
| <i>Echinochloa crus-galli</i> | Resistant   | 4.006  | 4.532  | -0.552 | -0.944 | 2.070  |
|                               | Susceptible | 0.295  | 2.344  | 0.615  | -1.664 | 0.601  |
| <i>Eleusine indica</i>        | Resistant   | 2.904  | -1.955 | 3.452  | 1.418  | 1.128  |
|                               | Susceptible | 2.238  | -2.036 | 2.304  | -0.161 | 0.561  |
| <i>Leptochloa chinensis</i>   | Resistant   | -4.867 | 2.155  | 2.417  | 1.290  | -0.353 |
|                               | Susceptible | -2.783 | 1.217  | 1.021  | 0.341  | -0.307 |

**Table S5.** Herbicide-resistant weeds and their resistance mechanisms

|                     | Herbicide-resistant weeds                                   | Resistance type       | Mutation sites | Location of origin                                                  | Source               |
|---------------------|-------------------------------------------------------------|-----------------------|----------------|---------------------------------------------------------------------|----------------------|
| <b>Wheat fields</b> | Fenoxaprop-p-ethyl-resistant<br><i>Alopecurus japonicus</i> | Non-target resistance | None           | Chuzhou, Anhui Province, China<br>(32°83'80.48"N, 119°4'74.44"E)    | Bi et al., (2016)    |
|                     | Glyphosate-resistant<br><i>Digitaria sanguinalis</i>        | Non-target resistance | None           | Changde, Hunan Province, China<br>(29°24'41.11" N, 112°10'15.46"E)  | Li et al., (2016)    |
|                     | Glyphosate-resistant<br><i>Eleusine indica</i>              | Target resistance     | Ser102-Ile     | Chengdu, Sichuan Province, China<br>(30°32'48.7"N, 103°54'53.2"E)   | Chen et al., (2017)  |
| <b>Paddies</b>      | Bensulfuron-resistant<br><i>Ammannia arenaria</i>           | Non-target resistance | None           | Suzhou, Jiangsu Province, China<br>(31°18'8.17" N, 120°37'52.75"E)  | Zhang et al., (2020) |
|                     | Metamifop -resistant<br><i>Echinochloa crus-galli</i>       | Non-target resistance | None           | Huai'an, Jiangsu Province, China<br>(33°35'51.03"N, 119°01'16.55"E) | Li et al., (2015)    |
|                     | Cyhalofop-resistant<br><i>Leptochloa chinensis</i>          | Target resistance     | Trp1999-Ser    | Nanjing, Jiangsu Province, China<br>(31°59'08"N, 118°25'55"E)       | Peng et al., (2020)  |

Bi, Y.L.; Liu, W.T.; Guo, W.L.; Li, L.X.; Yuan, G.H.; Du, L.; Wang, J.X. Molecular basis of multiple resistance to Accase- and ALS-inhibiting herbicides *Alopecurus japonicus* from China. *Pestic. Biochem. Physiol.* **2016**, *126*, 22-27.

Chen, J.C.; Huang, H.J.; Wei, S.H.; Huang, Z.F.; Wang, X.; Zhang, C.X. Investigating the mechanisms of glyphosate resistance in goosegrass (*Eleusine indica* (L.) Gaertn.) by RNA sequencing technology. *Plant J.* **2017**, *89*, 407-415.

Li, Y.; Zong, T.; Yang, H.N.; Bai, L.Y. Preliminary study on the resistance of *Digitaria sanguinalis* to glyphosate in cotton fields in the middle and lower reaches of the Yangtze river. *Cotton Sci.* **2016**, *28*, 300-306.

Li, Y.F.; Zhang, Z.C.; Yang, X.; Dong, M.C.; Zhang, B.; Han, J.Y. Susceptibility of weeds in *Echinochloa* to aryloxyphenoxypionate herbicides and the mechanism. *Jiangsu J. Agric. Sci.* **2015**, *31*, 543-551.

Peng, Y.J.; Pan, L.; Liu, D.C.; Cheng, X.M.; Ma, G.L.; Li, S.F.; Liu, X.Y.; Wang, L.F.; Bai, L.Y. Confirmation and characterization of cyhalofop-butyl-resistant Chinese sprangletop (*Leptochloa chinensis*) populations from China. *Weed Sci.* **2020**, *68*, 253-259.

Zhang, J.S.; Liu, B.; Cai, X.Z.; Zhou, W.J.; Wang, H.F.; Lu, Q.; Zhou, G.J.; Liu, Y.G.; Liang, W.; Wang, S.; Zhu, J.W. Resistance and its resistant molecular mechanism of *Ammannia arenaria* to ALS inhibiting herbicides. *Chin. J. Pestic. Sci.* **2020**, *22*, 60.
